# Supplementary material
Source: ML conference proceedings conference paper supplement (https://proceedings.mlr.press/v108/aglietti20a.html)
Supplement: Supplementary file 1 [file aglietti20a-supp.pdf]

---

## Supplementary Material for “Causal Bayesian Optimization”

---

**Virginia Aglietti**  
 University of Warwick  
 The Alan Turing Institute  
 V.Aglietti@warwick.ac.uk

**Xiaoyu Lu**  
 Amazon  
 Cambridge, UK  
 luxiaoyu@amazon.com

**Andrei Paleyes**  
 Amazon  
 Cambridge, UK  
 paleyes@amazon.com

**Javier González**  
 Amazon  
 Cambridge, UK  
 gojav@amazon.com

### 1 Derivations of *do*-calculus for the synthetic experiment

#### 1.1 $Do(B = b)$

$$\begin{aligned}
 p(y|do(B = b)) &= \int p(y|c, do(B = b))p(c|B = b)dc \\
 &= \int p(y|do(C = c), do(B = b))p(C = c|B = b)dc \quad (Y \perp\!\!\!\perp C|B \text{ in } \mathcal{G}_{\underline{BC}}) \\
 &= \int p(y|do(C = c))p(c|B = b)dc \quad (Y \perp\!\!\!\perp B|C \text{ in } \mathcal{G}_{\underline{B}, \underline{C}}) \\
 &= \int p(y|b', do(C = c))p(b'|do(C = c))p(c|B = b)db' dc \\
 &= \int p(y|b', C = c)p(b')p(c|B = b)db' dc \quad (Y \perp\!\!\!\perp C|B \text{ in } \mathcal{G}_{\underline{B}, \underline{C}})
 \end{aligned}$$

#### 1.2 $Do(D = d)$

$$\begin{aligned}
 p(y|do(D = d)) &= \int p(y|c, do(D = d))p(c|do(D = d))db \\
 &= \int p(y|c, D = d)p(c)dc \quad (Y \perp\!\!\!\perp D|C \text{ in } \mathcal{G}_{\underline{D}})
 \end{aligned}$$

#### 1.3 $Do(E = e)$

$$\begin{aligned}
 p(y|do(E = e)) &= \int p(y|a, c, do(E = e))p(a, c|do(E = e))dadc \\
 &= \int p(y|a, c, E = e)p(a)p(c)dadc \quad (Y \perp\!\!\!\perp E|A, C \text{ in } \mathcal{G}_{\underline{E}})
 \end{aligned}$$

#### 1.4 $Do(B = b, D = d)$

$$\begin{aligned}
 p(y|do(B = b), do(D = d)) &= \int p(y|do(B = b), c, do(D = d))p(c|do(B = b), do(D = d))dc \\
 &= \int p(y|do(B = b), do(C = c), do(D = d))p(c|B = b)dc \quad (Y \perp\!\!\!\perp C|B, D \text{ in } \mathcal{G}_{\underline{C}, \underline{B}, \underline{D}}) \\
 &= \int p(y|do(C = c), do(D = d))p(c|B = b)dc \quad (Y \perp\!\!\!\perp B|C, D \text{ in } \mathcal{G}_{\underline{B}, \underline{C}, \underline{D}}) \\
 &= \int p(y|b', do(C = c), do(D = d))p(b'|do(C = c), do(D = d))p(c|B = b)dadb' \\
 &= \int p(y|b', C = c, do(D = d))p(b')p(c|B = b)dadb' \quad (Y \perp\!\!\!\perp C|B, D \text{ in } \mathcal{G}_{\underline{B}, \underline{D}, \underline{C}}) \\
 &= \int p(y|b', C = c, D = d)p(b')p(c|B = b)dadb' \quad (Y \perp\!\!\!\perp D|B, C \text{ in } \mathcal{G}_{\underline{D}})
 \end{aligned}$$

**1.5**  $Do(B = b, E = e)$ 

$$\begin{aligned}
 p(y|do(B = b), do(E = e)) &= \int p(y|do(B = b), c, do(E = e))p(c|B = b)dc \\
 &= \int p(y|do(B = b), do(C = c), do(E = e))p(c|B = b)dc \quad (Y \perp\!\!\!\perp C|B, E \text{ in } \mathcal{G}_{\overline{B}\overline{E}C}) \\
 &= \int p(y|do(C = c), do(E = e))p(c|B = b)dc \quad (Y \perp\!\!\!\perp B|C, E \text{ in } \mathcal{G}_{C\overline{E}B}) \\
 &= \int p(y|do(C = c), do(E = e), b')p(b'|do(C = c), do(E = e))p(c|B = b)db'dc \\
 &= \int p(y|C = c, do(E = e), b')p(b')p(c|B = b)db'dc \quad (Y \perp\!\!\!\perp C|B, E \text{ in } \mathcal{G}_{\overline{E}C}) \\
 &= \int p(y|a, C = c, do(E = e), b')p(a|C = c, do(E = e), b')p(b')p(c|B = b)db'dcda \\
 &= \int p(y|a, b', C = c, E = e)p(a)p(b')p(c|B = b)db'dcda \quad (Y \perp\!\!\!\perp E|A, B, C \text{ in } \mathcal{G}_{\overline{E}})
 \end{aligned}$$

**1.6**  $Do(D = d, E = e)$ 

$$\begin{aligned}
 p(y|do(D = d), do(E = e)) &= \int p(y|a, c, do(D = d), do(E = e))p(a, c|do(D = d), do(E = e))dadc \\
 &= \int p(y|a, c, D = d, E = e)p(a)p(c)dadc \quad (Y \perp\!\!\!\perp (D, E)|A, C \text{ in } \mathcal{G}_{\overline{D}, \overline{E}})
 \end{aligned}$$

**1.7**  $Do(B = b, D = d, E = e)$ 

$$p(y|do(B = b), do(D = d), do(E = e)) = p(y|do(D = d), do(E = e)) \quad (Y \perp\!\!\!\perp B|D, E \text{ in } \mathcal{G}_{\overline{D}, \overline{E}, \overline{B}})$$

## 2 SEM for the synthetic experiment

The SEM for the synthetic example is:

$$\begin{aligned}
 U_1 &= \epsilon_{YA} \\
 U_2 &= \epsilon_{YB} \\
 F &= \epsilon_F \\
 A &= F^2 + U_1 + \epsilon_A \\
 B &= U_2 + \epsilon_B \\
 C &= \exp(-B) + \epsilon_C \\
 D &= \exp(-C)/10. + \epsilon_D \\
 E &= \cos(A) + C/10 + \epsilon_E \\
 Y &= \cos(D) + \sin(E) + U_1 + U_2\epsilon_y
 \end{aligned}$$

## 3 Cost configurations

Denote by  $Co(\mathbf{X}, \mathbf{x})$  the cost of intervening on node  $\mathbf{X}$  at the value  $\mathbf{x}$ . For the toy example and the real-data examples we consider fix unit cost across nodes. For the synthetic example we consider three possible cost

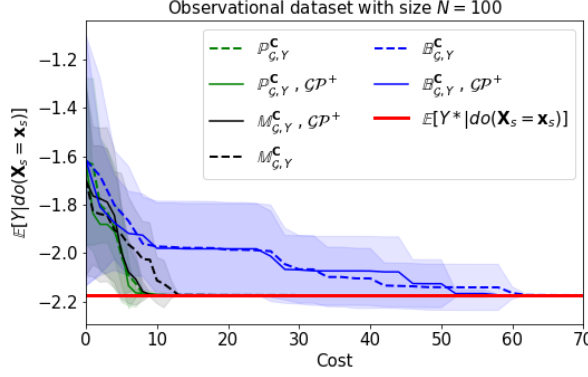

Figure 1: Toy example. Convergence of CBO and standard BO across different initializations of  $\mathcal{D}^I$ . The red line gives the optimal  $Y^*$  when intervening on sets in  $\mathbb{M}_{\mathcal{G},Y}^C$ ,  $\mathbb{P}_{\mathcal{G},Y}^C$  or  $\mathbb{B}_{\mathcal{G},Y}^C$ . Solid lines give CBO results when using the causal GP model which is denoted by  $\mathcal{GP}^+$ . Dotted line correspond to CBO with a standard GP prior model  $p(f(\mathbf{x}_s)) = \mathcal{GP}(0, k_{\text{RBF}}(\mathbf{x}_s, \mathbf{x}'_s))$ . Shaded areas are  $\pm$  standard deviation.

configurations: equal fix costs across nodes, different fix costs across nodes and variable costs across nodes. These are set to:

1. Fix equal costs:  $Co(B, b) = Co(D, d) = Co(E, e) = Co(F, f) = 1$ .
2. Fix different costs:  $Co(B, b) = 10$ ,  $Co(D, d) = 5$ ,  $Co(E, e) = 20$  and  $Co(F, f) = 3$ .
3. Variable costs:  $Co(B, b) = 10 + |b|$ ,  $Co(D, d) = 5 + |d|$ ,  $Co(E, e) = 20 + |e|$  and  $Co(F, f) = 3 + |f|$ .

## 4 Additional synthetic results

In Fig. 1 we show the results for the toy experiment across different initialization of  $\mathcal{D}^I$ .

In Fig. 2 we show the results for the synthetic experiment across different cost structures and values of  $N$ .

## 5 Example in Healthcare

The DAG describing the causal relationships between statin drugs and PSA (Thompson, 2019; Ferro et al., 2015) is given in Fig. 3. The SEM for this example is:

$$\begin{aligned}
 age &= \mathcal{U}(55, 75) \\
 bmi &= \mathcal{N}(27.0 - 0.01 \times age, 0.7) \\
 aspirin &= \sigma(-8.0 + 0.10 \times age + 0.03 \times bmi) \\
 statin &= \sigma(-13.0 + 0.10 \times age + 0.20 \times bmi) \\
 cancer &= \sigma(2.2 - 0.05 \times age + 0.01 \times bmi - 0.04 \times statin + 0.02 \times aspirin) \\
 Y &= \mathcal{N}(6.8 + 0.04 \times age - 0.15 \times bmi - 0.60 \times statin + 0.55 \times aspirin + 1.00 \times cancer, 0.4)
 \end{aligned}$$

where  $\mathcal{U}(a, b)$  denotes a uniform random variable with parameters  $a$  and  $b$ ,  $\mathcal{N}(m, s)$  represents a normal random variable with mean  $m$  and standard deviation  $s$  and  $\sigma$  denotes the sigmoidal function computed as  $\sigma(x) = \frac{1}{1+e^{-x}}$ .

## 6 Example in Ecology

The DAG describing the causal relationships between a set of environmental variables and NEC (Courtney et al., 2017) is given in Fig. 4. The variables included in the DAG are:

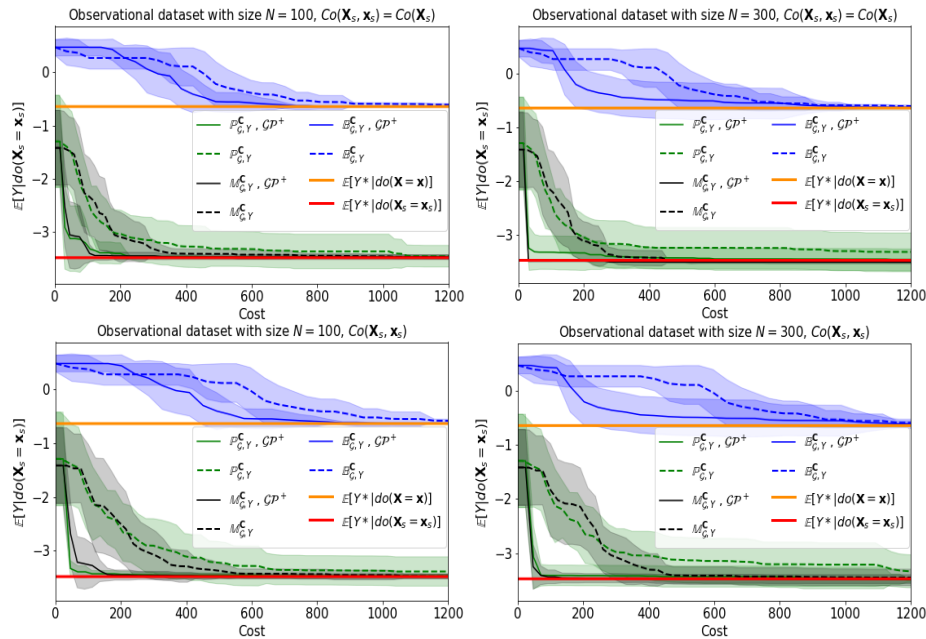

Figure 2: Synthetic example. Convergence of CBO and standard BO. The orange line gives the optimal  $Y^*$  when intervening on  $\mathbb{B}_{\mathcal{G},Y}^C$ . The red line gives the optimal  $Y^*$  when intervening on sets in  $\mathbb{M}_{\mathcal{G},Y}^C$  or  $\mathbb{P}_{\mathcal{G},Y}^C$ . Solid lines give CBO results when using the causal GP model which is denoted by  $\mathcal{GP}^+$ . Dotted lines correspond to CBO with a standard GP prior model. *Upper left*: option (2) in §3,  $N = 100$ . *lower left*: option (3) in §3,  $N = 100$ . *Upper right*: option (2) in §3,  $N = 300$ . *Lower right*: option (3) in §3,  $N = 300$ .

- $Chl\alpha$ : sea surface chlorophyll a;
- Sal: sea surface salinity;
- TA: seawater total alkalinity;
- DIC: seawater dissolved inorganic carbon;
- $P_{CO_2}$ : seawater  $P_{CO_2}$ ;
- Tem: bottom temperature;
- NEC: net ecosystem calcification;
- Light: bottom light levels;
- Nut: PC1 of  $NH_4$ ,  $NiO_2+NiO_3$ ,  $SiO_4$ ;
- $pH_{SW}$ : seawater pH;
- $\Omega_A$ : seawater saturation with respect to aragonite.

See Andersson (2018) for more details.

## References

Andersson, A., B. N. (2018). In situ measurements used for coral and reef-scale calcification structural equation modeling including environmental and chemical measurements, and coral calcification rates in bermuda from 2010 to 2012 (beacon project). *Biological and Chemical Oceanography Data Management Office (BCO-DMO). Dataset version 2018-03-02*. <http://lod.bco-dmo.org/id/dataset/720788>.

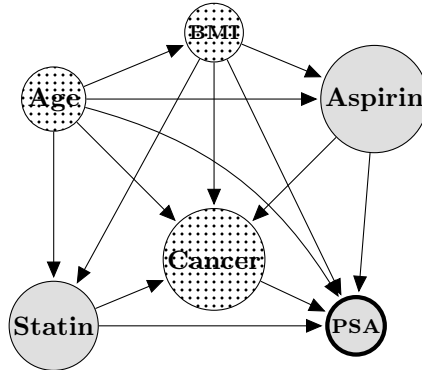

Figure 3: Causal graph of PSA level. Shaded nodes represent variables which can be intervened and dotted nodes represent non-manipulative variables. The target variable PSA is denoted with a thick shaded node.

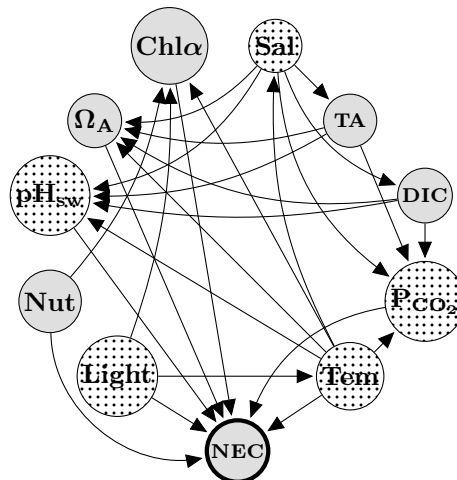

Figure 4: DAG of NEC level. Shaded nodes represent manipulative variables. Dotted nodes represent non-manipulative variables. The target variable NEC is denoted with a thick shaded node.

- Courtney, T. A., Lebrato, M., Bates, N. R., Collins, A., De Putron, S. J., Garley, R., Johnson, R., Molinero, J.-C., Noyes, T. J., Sabine, C. L., et al. (2017). Environmental controls on modern scleractinian coral and reef-scale calcification. *Science advances*, 3(11):e1701356.
- Ferro, A., Pina, F., Severo, M., Dias, P., Botelho, F., and Lunet, N. (2015). Use of statins and serum levels of prostate specific antigen. *Acta Urológica Portuguesa*, 32(2):71–77.
- Thompson, C. (2019). Causal graph analysis with the causalgraph procedure. <https://www.sas.com/content/dam/SAS/support/en/sas-global-forum-proceedings/2019/2998-2019.pdf>.
